## Books Received

| Title & Edition                                                                                               | Author/Editor                                                | Publisher                                                          |                                                             |             |
|---------------------------------------------------------------------------------------------------------------|--------------------------------------------------------------|--------------------------------------------------------------------|-------------------------------------------------------------|-------------|
|                                                                                                               |                                                              | Address, Name, Year                                                | Pages                                                       | Price       |
| <b>Lecture Notes on Anaesthetics</b>                                                                          | John N. Lunn                                                 | Worcester, England<br>Blackwell Scientific<br>Publications<br>1982 | 182                                                         | \$ 9.95     |
| <i>This is a very basic survey of anesthetic principles, aimed at the level of medical students.</i>          |                                                              |                                                                    |                                                             |             |
| <b>Pulmonary Diseases—Medical Examination Review</b>                                                          | N. LeRoy Lapp                                                | New York<br>Medical Examination<br>Publishing Co.<br>1983          | 284                                                         | \$25.00     |
| <b>Principles of Cardiac Arrhythmias</b>                                                                      | Edward K. Chung                                              | Baltimore<br>Williams and Wilkins Co.<br>1983                      | 809                                                         | \$75.00     |
| <i>This is a new edition of an excellent and comprehensive reference book on cardiac arrhythmias.</i>         |                                                              |                                                                    |                                                             |             |
| <b>Clinical Diagnosis</b>                                                                                     | Richard D. Judge<br>George D. Zuidema<br>Faith T. Fitzgerald | Boston<br>Little, Brown and Company<br>1982                        | 606                                                         | \$29.95     |
| <i>The fourth edition of an unusually readable and informative basic diagnostic text.</i>                     |                                                              |                                                                    |                                                             |             |
| <b>Procedures and Techniques in Emergency Medicine</b>                                                        | Robert R. Simon<br>Barry E. Brenner                          | Baltimore<br>Williams and Wilkins Co.<br>1982                      | 404                                                         | \$44.00     |
| <i>The greatest emphasis of this elementary textbook on emergency medicine is on surgical considerations.</i> |                                                              |                                                                    |                                                             |             |
| <b>Clinical Frontiers in Anesthesiology</b>                                                                   | Jonathon L. Benumof                                          | New York<br>Grune and Stratton<br>1983                             | 281                                                         | \$28.50     |
| <b>Practical Electrocardiography</b><br>(7th Edition)                                                         | Henry J. L. Marriott                                         | Baltimore<br>Williams and Wilkins<br>1983                          | 496                                                         | \$18.95     |
| <i>An upgraded version of a classic. A good choice for those who wish a single ECG reference text.</i>        |                                                              |                                                                    |                                                             |             |
| <b>Medical Emergency Manual</b><br>(3rd Edition)                                                              | Morris A. Swartz<br>Mary E. Moore                            | Baltimore<br>Williams and Wilkins<br>1983                          | 213                                                         | \$14.95     |
| <b>Mechanism on Pain and Acupuncture</b>                                                                      | Koyo Takase                                                  | Tokyo<br>The 21th Century, Co., Inc.<br>1983                       | 30 (English plus<br>tables)<br>36 (Japanese plus<br>tables) | \$20        |
| <b>Airborne Care of the Ill and Injured</b>                                                                   | Edward L. McNeil                                             | New York<br>Springer-Verlag<br>1983                                | 208                                                         |             |
| <b>Immunologie in der Anaesthesiologie und Internivmedizin</b>                                                | Alfred Doenicke<br>Karl Steinbereithner                      | Vienna<br>Verlag Wilhelm Maudrich<br>1982                          | 192                                                         | DM<br>59,80 |
| <b>New Anesthetic Agents, Devices and Monitoring Techniques</b>                                               | Theodore H. Stanley<br>W. Clayton Petty                      | Boston<br>Martinus Nijhoff Publishers<br>1983                      | 204                                                         | \$35.00     |
| <b>Traumatic Injury</b>                                                                                       | John L. Ninnemann                                            | Baltimore<br>University Park Press<br>1983                         | 272                                                         | \$39.50     |
| <b>Atherosclerosis Reviews Noninvasive Methods in Atherosclerosis Research</b><br>(Volume 10)                 | Ruth Johnsson Hegyeli                                        | New York<br>Raven Press<br>1983                                    | 214                                                         | \$39.50     |
| <b>Postoperative Thromboembolism</b>                                                                          | David Bergqvist                                              | New York<br>Springer-Verlag<br>1983                                | 234                                                         | \$38.50     |
| <b>Surgical Management of Cerebrovascular Disease</b>                                                         | Robert C. Ojemann<br>Robert M. Crowell                       | Baltimore<br>Williams and Wilkins<br>1983                          | 316                                                         | \$69.95     |
| <i>An excellent comprehensive text with outstanding radiography and illustrations.</i>                        |                                                              |                                                                    |                                                             |             |
